# Supplementary material
Source: MDPI journal article supplement (https://www.mdpi.com/2071-1050/12/13/5301)
Supplement: s1 [file s1]

Archive with 3 entries (3 files):
- Supplementary Material/A.pdf
- Supplementary Material/B.pdf
- Supplementary Material/C.pdf
