# Supplementary material
Source: MDPI journal article supplement (https://www.mdpi.com/2071-1050/12/13/5301)
Supplement: s1 [file s1 › Supplementary Material/B.pdf]

## Supplementary material for “A Serious Game Approach to Analyze Socio-hydrological Dynamics in Agriculture”

By Maria Elena Orduña Alegria<sup>1</sup>, Niels Schütze<sup>1</sup>, Sam C. Zipper<sup>2</sup>

<sup>1</sup> Institute of Hydrology and Meteorology, Technische Universität Dresden, Bergstr. 66, 01069 Dresden, Germany.

<sup>2</sup> Kansas Geological Survey, University of Kansas, Lawrence KS, USA.  
Correspondence: maria\_elena.orduna\_alegria@tu-dresden.de

**Table SM1: Play-test sessions (Not recorded).**

| Session | Date     | Location | Academic Background   | No. Participants |
|---------|----------|----------|-----------------------|------------------|
| 1       | 04.03.19 | Germany  | Agriculture           | 4                |
| 2       | 10.03.19 | Germany  | Agriculture           | 3                |
| 3       | 15.03.19 | Germany  | Boardgame Development | 4                |

We play-tested MAHIZ with two main groups: farmers and boardgame developers before starting our recorded game sessions. These play-test sessions are not included in our analysis. These groups were consulted for the following reasons:

1. We consulted and tested the game with smallholder farmers from Germany to validate the dynamics represented by the game and the situations that lead to collaboration or free riding.
2. We consulted board game developers to validate the effectiveness of the mechanics and the design (board, pieces, and cards) to enhance the complexity of cooperation, communication, and building of trust while making an entertaining game.

The input of these play-testing sessions ensured the reproducibility of the game for the recorded game sessions by focusing on making the game understandable so that players with no background knowledge of the system were able to fully experienced the agrohydrological situation and learn from the learning experience.

**Table SM2: Summary of the recorded sessions.**

| Session | Date     | Location       | Academic Background | No. Participants |
|---------|----------|----------------|---------------------|------------------|
| 1       | 10.04.19 | Austria        | Multidisciplinary   | 4                |
| 2       | 20.04.19 | Germany        | Agriculture         | 3                |
| 3       | 25.04.19 | Germany        | Multidisciplinary   | 2                |
| 4       | 03.05.19 | Germany        | Agriculture         | 4                |
| 5       | 13.06.19 | Germany        | Multidisciplinary   | 2                |
| 6       | 21.06.19 | Germany        | Hydrology           | 4                |
| 7       | 25.06.19 | Germany        | Hydrology           | 4                |
| 8       | 27.05.19 | Germany        | Hydrology           | 2                |
| 9       | 02.07.19 | Germany        | Multidisciplinary   | 2                |
| 10      | 04.07.19 | Germany        | Hydrology           | 3                |
| 11      | 09.07.19 | Germany        | Multidisciplinary   | 3                |
| 12      | 11.07.19 | Germany        | Multidisciplinary   | 3                |
| 13      | 12.07.19 | Germany        | Multidisciplinary   | 3                |
| 14      | 18.07.19 | Germany        | Hydrology           | 4                |
| 15      | 26.07.19 | Czech Republic | Hydrobiology        | 3                |
| 16      | 27.07.19 | Czech Republic | Multidisciplinary   | 3                |

|              |          |                |                   |            |
|--------------|----------|----------------|-------------------|------------|
| 17           | 30.07.19 | Czech Republic | Multidisciplinary | 2          |
| 18           | 06.08.19 | Germany        | Hydrology         | 2          |
| 19           | 08.08.19 | Germany        | Hydrobiology      | 4          |
| 20           | 09.08.19 | Germany        | Hydrobiology      | 4          |
| 21           | 22.08.19 | Germany        | Hydrology         | 3          |
| 22           | 05.09.19 | Germany        | Hydrology         | 2          |
| 23           | 17.09.19 | France         | Multidisciplinary | 4          |
| 24           | 18.09.19 | France         | Multidisciplinary | 4          |
| 25           | 25.09.19 | France         | Multidisciplinary | 3          |
| 26           | 26.09.19 | France         | Multidisciplinary | 3          |
| 27           | 10.10.19 | Germany        | Multidisciplinary | 4          |
| 28           | 11.10.19 | Germany        | Multidisciplinary | 3          |
| 29           | 27.10.19 | Mexico         | Multidisciplinary | 4          |
| 30           | 28.10.19 | Mexico         | Multidisciplinary | 3          |
| 31           | 29.10.19 | Mexico         | Agriculture       | 4          |
| 32           | 31.10.19 | Mexico         | Agriculture       | 4          |
| 33           | 21.11.19 | Germany        | Hydrology         | 3          |
| 34           | 08.12.19 | USA            | Multidisciplinary | 4          |
| 35           | 10.12.19 | USA            | Multidisciplinary | 4          |
| <b>Total</b> |          |                |                   | <b>113</b> |
